# Supplementary material for: A titanium nitride nanotube array for potentiometric sensing of pH
Source: Royal Society of Chemistry journal article supplement (doi:10.1039/c5an02675j), 2016-01-01
Supplement: c5an02675j1.pdf [file c5an02675j1.pdf]

## Electronic Supporting Information

# **Titanium nitride nanotube array for potentiometric sensing of pH**

*Mengyang Liu<sup>a</sup>, Yanling Ma<sup>a</sup>, Lei Su<sup>b</sup>, Kuo-Chih Chou<sup>a</sup>, Xinmei Hou<sup>a\*</sup>*

<sup>a</sup> State Key Laboratory of Advanced Metallurgy, University of Science and Technology Beijing, Beijing 100083, China

Email: [houxinmei@ustb.edu.cn](mailto:houxinmei@ustb.edu.cn)

<sup>b</sup> Research Center for Bioengineering and Sensing Technology, School of Chemistry and Biological Engineering, University of Science and Technology Beijing, Beijing 100083, China.

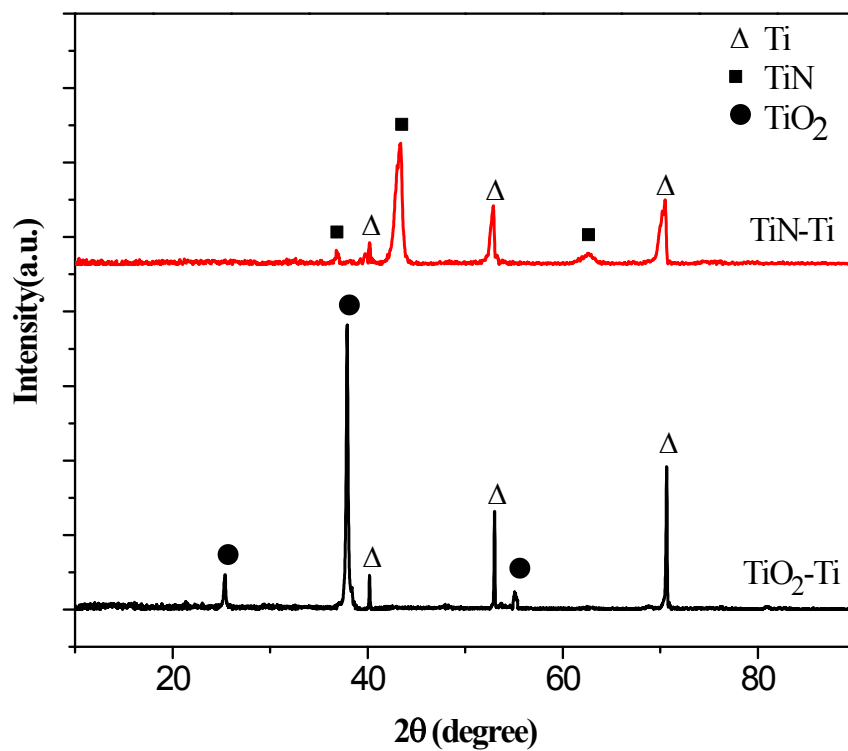

Fig. S1 XRD patterns of  $\text{TiO}_2$  NTA and TiN NTA on the Ti sheet

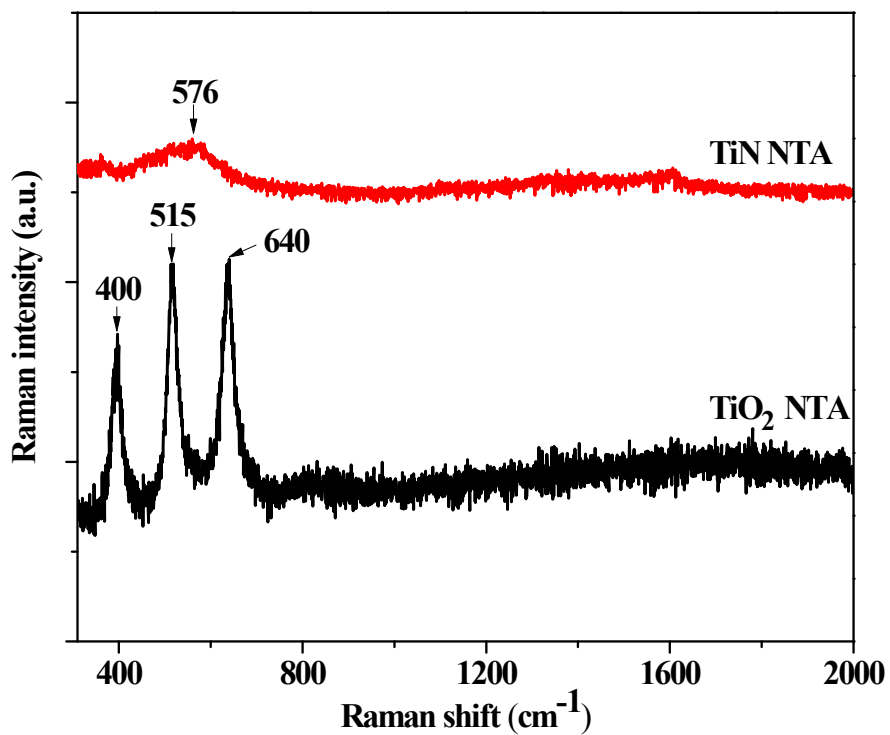

Fig. S2 Raman spectra of  $\text{TiO}_2$  NTA and TiN NTA

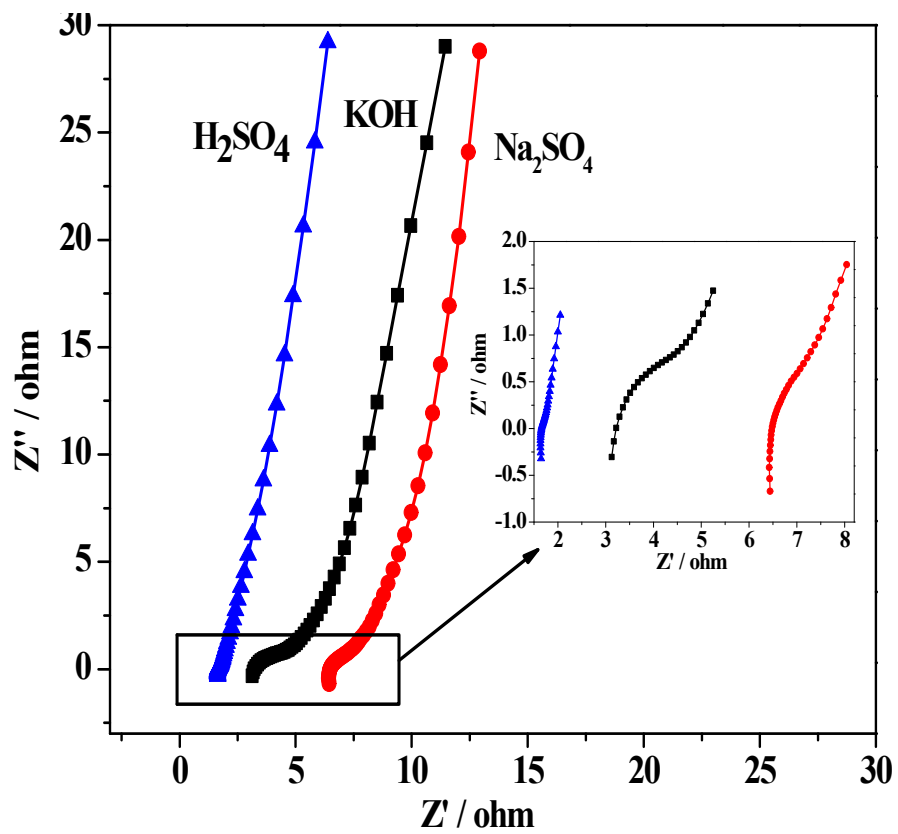

Fig. S3 EIS plots of TiN NTA electrode in 1mol/L H<sub>2</sub>SO<sub>4</sub>, KOH and Na<sub>2</sub>SO<sub>4</sub>
